# Supplementary material for: Initial Description of the Genome of Aeluropus littoralis, a Halophile Grass
Source: Front Plant Sci. 2022 Jul 11;13:906462. doi: 10.3389/fpls.2022.906462 (PMC9310549; doi:10.3389/fpls.2022.906462)
Supplement: Supplementary Table 2 — Comparison of Aeluropus genome assembly with rice, millet and stiff brome. [file Table_2.XLSX]

## Sheet: Tabelle1
	Supple. Table 2
			Oryza sativa	Sorghum bicolor	Brachypodium distachon	Aeluropus littoralis
		Assembly	IRGSP-1.0, INSDC	Sorghum_bicolor_NCBIv3	Brachypodium_distachyon_v3.0,	this study
	Chromosome number	(2n)	24	20	10	20
	Genome	Size	500 Mb	730 Mb	355 Mb	354 Mb
	Sequencing	covered sequence	375,049,285	675,363,888	270,739,641	300,381,201
	Sequenced	%	75	93	76	85
	Gene number	annot. coding genes	37849	34118	34310	15916
